# Supplementary material for: Photo images, 3D/CT data and mtDNA of the freshwater mussels (Bivalvia: Unionidae) in the Kyushu and Ryukyu Islands, Japan, with SEM/EDS analysis of the shell
Source: Biodivers Data J. 2019 Jan 28;(7):e32114. doi: 10.3897/BDJ.7.e32114 (PMC6361872; doi:10.3897/BDJ.7.e32114)
Supplement: Supplementary material 1 — Elemental composition of the shell by EDS [file bdj-07-e32114-s001.csv]

specimen ID	species	locality	B	C	N	O	F	Na	Mg	Al	Si	P	S	Cl	K	Ca
QUYK-00315	Cristaria tenuis	Nagura River System	2.31%	44.22%	0.00%	47.06%	0.00%	0.60%	0.02%	0.05%	0.02%	0.02%	0.01%	0.01%	0.00%	5.68%
QUYK-08811	Cristaria tenuis	Tsurikawa River System	0.00%	49.05%	2.37%	38.37%	0.31%	0.13%	0.05%	0.11%	0.07%	0.72%	0.01%	0.03%	0.01%	8.78%
QUYK-08809	Cristaria tenuis	Tsurikawa River System	3.51%	38.97%	0.00%	50.10%	0.78%	0.08%	0.04%	0.10%	0.02%	0.03%	0.01%	0.01%	0.00%	6.34%
QUYK-08915	Inversidens brandti	Furukawa River System	2.96%	51.00%	3.39%	31.68%	0.00%	1.20%	0.01%	0.04%	0.02%	0.04%	0.03%	0.23%	0.07%	9.33%
QUYK-08914	Inversidens brandti	Furukawa River System	0.00%	48.79%	0.00%	41.59%	0.02%	0.07%	0.03%	0.07%	0.12%	0.09%	0.03%	0.04%	0.05%	9.08%
QUYK-08916	Inversidens brandti	Furukawa River System	0.00%	47.91%	2.18%	41.07%	0.31%	0.25%	0.00%	0.04%	0.06%	0.04%	0.02%	0.09%	0.09%	7.94%
QUYK-06859	Inversiunio yanagawensis	Kikuchigawa River System	0.00%	45.08%	0.00%	44.31%	0.39%	0.28%	0.05%	0.02%	0.11%	0.13%	0.00%	0.01%	0.02%	9.61%
QUYK-06861	Inversiunio yanagawensis	Kikuchigawa River System	0.00%	45.37%	1.77%	42.25%	0.59%	0.02%	0.07%	0.07%	0.06%	0.08%	0.02%	0.03%	0.02%	9.65%
QUYK-06860	Inversiunio yanagawensis	Kikuchigawa River System	1.01%	36.01%	0.00%	50.49%	0.00%	0.22%	0.01%	0.08%	0.01%	0.05%	0.02%	0.03%	0.55%	11.54%
QUYK-08920	Lanceolaria grayana	Furukawa River System	1.55%	35.44%	3.08%	49.44%	0.18%	0.09%	0.04%	0.00%	0.03%	0.16%	0.04%	0.03%	0.00%	9.92%
QUYK-08665	Lanceolaria grayana	Katsura River System	1.19%	42.31%	0.00%	47.98%	0.00%	0.41%	0.02%	0.03%	0.01%	0.08%	0.01%	0.02%	0.14%	7.81%
QUYK-08774d	Lanceolaria grayana	Katsura River System	0.00%	48.72%	16.78%	27.15%	0.05%	0.08%	0.09%	0.05%	0.08%	0.23%	0.02%	0.02%	0.00%	6.74%
QUYK-08875	Obovalis omiensis	Yamakunigawa River System	2.74%	45.05%	0.48%	46.48%	0.00%	0.11%	0.06%	0.03%	0.01%	0.33%	0.01%	0.03%	0.00%	4.67%
QUYK-08878	Obovalis omiensis	Yamakunigawa River System	2.30%	53.27%	3.10%	30.94%	0.46%	0.28%	0.12%	0.06%	0.04%	4.44%	0.05%	0.00%	0.06%	4.88%
QUYK-08872	Obovalis omiensis	Yamakunigawa River System	3.28%	42.58%	0.00%	47.12%	0.00%	0.33%	0.01%	0.08%	0.01%	0.01%	0.01%	0.01%	0.47%	6.08%
QUYK-08874	Pronodularia japanensis	Yamakunigawa River System	1.80%	40.00%	0.00%	47.12%	0.00%	0.54%	0.01%	0.03%	0.02%	0.07%	0.02%	0.00%	0.05%	10.35%
QUYK-08881	Pronodularia japanensis	Yamakunigawa River System	0.00%	61.68%	3.72%	22.01%	1.18%	0.02%	0.05%	0.08%	0.24%	3.22%	0.26%	0.10%	0.10%	7.35%
QUYK-08880	Pronodularia japanensis	Yamakunigawa River System	0.00%	52.03%	6.61%	33.65%	0.27%	0.34%	0.11%	0.04%	0.02%	3.29%	0.02%	0.04%	0.06%	3.53%
QUYK-08886	Pronodularia japanensis	Yamakunigawa River System	3.74%	56.51%	0.00%	33.32%	0.00%	0.26%	0.11%	0.04%	0.03%	3.39%	0.04%	0.02%	0.03%	2.52%
QUYK-08873	Sinanodonta japonica	Tenkaigawa River System	2.90%	47.26%	0.00%	42.90%	0.00%	0.30%	0.01%	0.04%	0.02%	0.03%	0.02%	0.02%	0.33%	6.15%
QUYK-08891	Sinanodonta japonica	Tenkaigawa River System	0.00%	36.78%	0.00%	55.90%	0.65%	0.29%	0.11%	0.07%	0.01%	0.04%	0.01%	0.06%	0.01%	6.09%
QUYK-08890	Sinanodonta japonica	Tenkaigawa River System	1.14%	38.92%	3.62%	46.06%	0.00%	0.28%	0.05%	0.06%	0.00%	0.27%	0.00%	0.03%	0.05%	9.52%
QUYK-05606	Sinanodonta lauta	Furukawa River System	0.50%	39.65%	0.00%	45.12%	0.02%	0.11%	0.01%	0.06%	0.01%	0.12%	0.01%	0.01%	0.38%	13.99%
QUYK-08668	Sinanodonta lauta	Katsura River System	0.16%	41.12%	1.54%	41.39%	0.12%	0.19%	0.03%	0.08%	0.00%	0.28%	0.02%	0.02%	0.79%	14.27%
QUYK-08933	Sinanodonta lauta	Matsuuragawa River system	0.53%	45.42%	0.00%	45.32%	0.67%	0.18%	0.06%	0.04%	0.01%	0.07%	0.05%	0.01%	0.00%	7.64%
QUYK-08935	Sinanodonta lauta	Matsuuragawa River system	2.08%	44.64%	0.00%	40.63%	0.00%	0.22%	0.00%	0.04%	0.01%	0.09%	0.04%	0.01%	0.39%	11.84%
QUYK-08918	Unio douglasiae nipponensis	Furukawa River System	0.00%	49.76%	1.07%	40.59%	0.00%	0.07%	0.06%	0.05%	0.11%	0.14%	0.03%	0.04%	0.05%	8.03%
QUYK-08664d	Unio douglasiae nipponensis	Matsuuragawa River system	1.90%	38.42%	0.00%	49.53%	0.00%	0.26%	0.02%	0.06%	0.05%	0.11%	0.03%	0.01%	0.23%	9.38%
QUYK-07468	Unio douglasiae nipponensis	Matsuuragawa River system	0.00%	41.16%	0.00%	53.58%	0.00%	0.04%	0.13%	0.09%	0.09%	0.04%	0.02%	0.04%	0.07%	4.74%
